# Supplementary material for: Nanoscale engineering of solid-state materials for boosting hydrogen storage
Source: Royal Society of Chemistry journal article supplement (doi:10.1039/d3cs00706e), 2023-12-19
Supplement: d3cs00706e1.pdf [file d3cs00706e1.pdf]

## Supplementary Information

### Nanoscale engineering of solid-state materials for boosting hydrogen storage

Yunting Wang,<sup>‡a,b\*</sup> Yudong Xue,<sup>‡a\*</sup> Andreas Züttel<sup>a,b\*</sup>

<sup>a</sup> *Institute of Chemical Sciences and Engineering, École polytechnique fédérale de Lausanne (EPFL),  
CH-1950 Sion, Switzerland*

<sup>b</sup> *Empa Materials Science and Technology, 8600 Dübendorf, Switzerland*

Table S1. Comparison of different hydrogen storage technologies.

| Storage method                              | Conditions                                | Equipment/Materials                                                                                                                                                                                                                                                                                                                                 | Hydrogen storage capacity                                                | Advantages                                                                                                                                                                   | Disadvantages                                                                                                                                                                                                                                                                                                             | Ref.    |
|---------------------------------------------|-------------------------------------------|-----------------------------------------------------------------------------------------------------------------------------------------------------------------------------------------------------------------------------------------------------------------------------------------------------------------------------------------------------|--------------------------------------------------------------------------|------------------------------------------------------------------------------------------------------------------------------------------------------------------------------|---------------------------------------------------------------------------------------------------------------------------------------------------------------------------------------------------------------------------------------------------------------------------------------------------------------------------|---------|
| Compressed hydrogen storage                 | 200~700 bar<br>room temperature           | Type I: pressure cylinder all made with metal<br>Type II: pressure vessel made of metal liner with hoop wrapping<br>Type III: pressure vessel made of metal liner with full composite wrapping<br>Type IV: pressure vessel made of plastic liner with full composite wrapping                                                                       | 11.0 kg/m <sup>3</sup> (200 bar)<br>39.0 kg/m <sup>3</sup> (700 bar)     | <ul style="list-style-type: none"> <li>· Technical simplicity and reliability</li> <li>· Fast filling-releasing rate</li> <li>· Commercially available</li> </ul>            | <ul style="list-style-type: none"> <li>· Safety issue at higher storage pressure</li> <li>· Relatively low volumetric storage density</li> <li>· High compression energy</li> <li>· Require heat management during charging</li> <li>· High transport costs</li> <li>· Heavy and expensive high-pressure tanks</li> </ul> | 1-3     |
| Liquid hydrogen storage                     | 1 bar<br><-253 °C                         | Cryogenic storage tanks (double walled and vacuum insulated)                                                                                                                                                                                                                                                                                        | 70.8 kg/m <sup>3</sup><br>Size dependent                                 | <ul style="list-style-type: none"> <li>· High gravimetric density (&gt;5.00 wt.%)</li> <li>· Commercially available</li> </ul>                                               | <ul style="list-style-type: none"> <li>· H<sub>2</sub> loss</li> <li>· Safety issue at super low temperatures</li> <li>· High liquefaction energy</li> <li>· Heat management to reduce</li> <li>· Low boiling point of liquid hydrogen</li> <li>· Require specialized and expensive equipment</li> </ul>                  | 1-4     |
| Cryo-compressed hydrogen storage            | 250~350 bar<br><-253 °C                   | Type III pressure vessel consists of aluminum liner wrapped with carbon fiber composite                                                                                                                                                                                                                                                             | 87.0 kg/m <sup>3</sup>                                                   | <ul style="list-style-type: none"> <li>· High volumetric capacity</li> <li>· Rapid filling-releasing rate</li> </ul>                                                         | <ul style="list-style-type: none"> <li>· High pressure</li> <li>· High compression/liquefaction energy</li> <li>· Safety issue at high pressure and super low temperature</li> <li>· More expensive storage vessel</li> </ul>                                                                                             | 2, 3, 5 |
| Liquid organic hydrogen carriers            | 30~50 bar<br>150~200 °C<br>with catalysts | Toluene/Methylcyclohexane;<br>Dibenzyltoluene/Perhydro-dibenzyltoluene                                                                                                                                                                                                                                                                              | 47.7 kg/m <sup>3</sup> , 6.16 wt.%<br>57.0 kg/m <sup>3</sup> , 6.20 wt.% | <ul style="list-style-type: none"> <li>· High hydrogen storage capacity</li> <li>· Closed carbon cycle</li> <li>· Long-cycle storage and transport</li> </ul>                | <ul style="list-style-type: none"> <li>· High energy consumption for dehydrogenation</li> <li>· Difficulty in developing dehydrogenation catalysts</li> <li>· Short cycle life</li> </ul>                                                                                                                                 | 1, 6    |
| Adsorbed hydrogen in porous materials       | 1~100 bar<br>-196 °C or room temperature  | Porous carbons (Activated carbon, Carbon nanotubes, Graphene, biomass-derived carbon, MOF-derived carbon, etc.)<br>Metal-organic frameworks<br>Covalent organic frameworks                                                                                                                                                                          | 1.00~12.00 wt.%<br>1.00~18.00 wt.%<br>1.00~12.00 wt.%                    | <ul style="list-style-type: none"> <li>· Light weight</li> <li>· Fast charging–discharging speed</li> <li>· Fully reversible</li> <li>· High security performance</li> </ul> | <ul style="list-style-type: none"> <li>· Easily influenced by reaction conditions and material preparation processes</li> <li>· Low room temperature capacity</li> </ul>                                                                                                                                                  | 1, 2    |
| Absorbed hydrogen in metal/complex hydrides | 1 bar<br>>100 °C                          | Elemental hydrides (MgH <sub>2</sub> )<br>Intermetallic hydrides (LaNi <sub>5</sub> , FeTi, Zr-based, Ti-based, Mg <sub>2</sub> Ni, etc.)<br>Complex hydrides (NaAlH <sub>4</sub> , LiAlH <sub>4</sub> , Mg(AlH <sub>4</sub> ) <sub>2</sub> , NaBH <sub>4</sub> , LiBH <sub>4</sub> , Mg(BH <sub>4</sub> ) <sub>2</sub> , LiNH <sub>2</sub> , etc.) | 7.65 wt.%<br>1.00~8.00 wt.%<br>7.40~18.80 wt.%                           | <ul style="list-style-type: none"> <li>· High volumetric density</li> <li>· Fully reversible</li> <li>· High security performance</li> </ul>                                 | <ul style="list-style-type: none"> <li>· Low sorption and desorption kinetics</li> <li>· High hydrogen release temperature</li> <li>· Formation of undesirable gases during discharging the hydrogen</li> <li>· Limited gravimetric capacity</li> </ul>                                                                   | 1, 2, 7 |
| Absorbed hydrogen in chemical hydrides      | >100 °C                                   | Ammonia borane (NH <sub>3</sub> BH <sub>3</sub> )<br>Hydrazine borane (N <sub>2</sub> H <sub>4</sub> BH <sub>3</sub> )<br>Hydrous hydrazine (H <sub>2</sub> NNH <sub>2</sub> ), etc.                                                                                                                                                                | 19.60 wt.%<br>15.40 wt.%<br>12.50 wt.%                                   | <ul style="list-style-type: none"> <li>· Good gravimetric/volumetric capacity</li> </ul>                                                                                     | <ul style="list-style-type: none"> <li>· High hydrogen release temperature</li> <li>· No on-board regeneration</li> <li>· Require thermal management</li> <li>· Undesirable gaseous by-products</li> </ul>                                                                                                                | 2, 8, 9 |

Table S2. Overview of recent reviews on the topic of hydrogen storage and the difference between our review and previously reported ones.

| Title                                                                                                                   | Ref.       | Year | Porous materials | Metal hydrides              | Insights on nanomaterials | Nanoscale tuning and designing | DOI                            |
|-------------------------------------------------------------------------------------------------------------------------|------------|------|------------------|-----------------------------|---------------------------|--------------------------------|--------------------------------|
| Hydrogen storage in metal-organic frameworks                                                                            | 10         | 2012 | √<br>(MOFs)      | -                           | -                         | -                              | 10.1021/cr200274s              |
| Energy storage applications of activated carbons: supercapacitors and hydrogen storage                                  | 11         | 2014 | √<br>(Carbons)   | -                           | -                         | -                              | 10.1039/C3EE43525C             |
| Hydrogen storage in Mg: A most promising material                                                                       | 12         | 2010 | -                | √<br>(Mg hydrides)          | -                         | -                              | 10.1016/j.ijhydene.2009.08.088 |
| High capacity hydrogen storage materials: attributes for automotive applications and techniques for materials discovery | 13         | 2010 | √                | √                           | -                         | -                              | 10.1039/B802882F               |
| Hydrogen energy, economy and storage: Review and recommendation                                                         | 14         | 2019 | -                | √                           | -                         | -                              | 10.1016/j.ijhydene.2019.04.068 |
| A review on the current progress of metal hydrides material for solid-state hydrogen storage applications               | 15         | 2016 | -                | √                           | -                         | -                              | 10.1016/j.ijhydene.2016.05.244 |
| Dimensional effects of nanostructured Mg/MgH <sub>2</sub> for hydrogen storage applications: A review                   | 16         | 2017 | -                | √<br>(Mg/MgH <sub>2</sub> ) | √                         | -                              | 10.1016/j.rser.2017.01.107     |
| Recent advances and remaining challenges of nanostructured materials for hydrogen storage applications                  | 17         | 2017 | √                | √                           | √                         | -                              | 10.1016/j.pmatsci.2017.03.001  |
| Nanostructured metal hydrides for hydrogen storage                                                                      | 18         | 2018 | -                | √                           | √<br>(Metal hydrides)     | √<br>(Metal hydrides)          | 10.1021/acs.chemrev.8b00313    |
| Perspectives and challenges of hydrogen storage in solid-state hydrides                                                 | 19         | 2021 | -                | √                           | -                         | -                              | 10.1016/j.cjche.2020.08.024    |
| Nanoscale engineering of solid-state materials for boosting hydrogen storage                                            | Our review | 2023 | √                | √                           | √                         | √                              |                                |

Table S3. References for hydrogen storage materials in Figs. 3, 5, and 10.

| Materials                               | Ref.   | Materials                                 | Ref.   | Materials                      | Ref.   | Materials                                              | Ref.   |
|-----------------------------------------|--------|-------------------------------------------|--------|--------------------------------|--------|--------------------------------------------------------|--------|
| Superactivated carbide-derived carbon   | 20     | Heteroatom self-doped activated biocarbon | 21     | Bamboo-based AC                | 22     | Posidonia Oceanica-derived AC                          | 23     |
| Cigarette butts derived porous carbon   | 24     | Oxygen-rich microporous carbon            | 25     | Few-layer graphene-like flakes | 26     | Nitrogen-doped porous carbons                          | 27     |
| Coffee bean waste-derived AC            | 28     | Sword-bean shells-derived AC              | 21     | ZTC                            | 29     | Activated carbon cloth                                 | 30     |
| Activated CNTs                          | 31     | Coffee waste-derived nanoporous carbons   | 32     | Activated ZTC                  | 29     | Nanoporous activated carbon cloth                      | 33     |
| Activated rGO                           | 34     | Olive pomace AC                           | 35     | Cu-MOF-74                      | 36     | HKUST                                                  | 36     |
| NOTT-112                                | 36     | NU-125                                    | 36     | rht-MOF-7                      | 36     | PCN-250                                                | 36     |
| NU-1000                                 | 36     | UiO-67                                    | 36     | UiO-68-Ant                     | 36     | CYCU-3-Al                                              | 36     |
| MFU-4l-Li                               | 37     | MFU-4l                                    | 37, 38 | MOF-5                          | 39, 40 | NU-1501-Al                                             | 41     |
| NU-1501-Fe                              | 41     | NU-1500-Al                                | 41     | NU-1102                        | 42     | NU-1103                                                | 42, 43 |
| NU-1101                                 | 42     | IRMOF-20                                  | 40     | BUT-22                         | 44     | SNU-70                                                 | 45     |
| UMCM-9                                  | 45     | PCN-610/NU-100                            | 45     | UiO-66                         | 46     | Fe-BTT                                                 | 47     |
| MIL-100(Fe)                             | 48, 49 | MOF-177                                   | 48, 49 | ZIF-8                          | 48, 49 | MOF-210                                                | 50, 51 |
| COF-1                                   | 52, 53 | COF-5                                     | 52, 53 | COF-102                        | 54, 55 | COF-103                                                | 54, 55 |
| BP-COF-5                                | 56     | N-HEG                                     | 57     | N-SG                           | 58     | P-doped GO                                             | 59     |
| BCNT                                    | 60     | Pd-MWCNTs                                 | 61     | Pd/N-SG                        | 58     | Pt-CAs                                                 | 62     |
| Pt-HEG                                  | 63     | Pd@COF-102                                | 64     | Pt/aUiO-C                      | 65     | Ni-doped ACNF                                          | 66     |
| COF-301-CoCl <sub>2</sub>               | 67     | COF-301-NiCl <sub>2</sub>                 | 67     | COF-301-FeCl <sub>2</sub>      | 67     | COF-350-CoCl <sub>2</sub>                              | 67     |
| MgH <sub>2</sub> nanoparticles (4.5 nm) | 68     | MgH <sub>2</sub> nanoparticles (150 nm)   | 69     | NaBH <sub>4</sub> nanosphere   | 70     | NaBH <sub>4</sub> nanoparticles                        | 71     |
| NaBH <sub>4</sub> -ODA                  | 72     | NaBH <sub>4</sub> -DDA                    | 72     | LiBH <sub>4</sub> -DDA         | 73     | LiBH <sub>4</sub> -C <sub>18</sub> NH <sub>2</sub> -5% | 74     |
| Nano-LiBH <sub>4</sub>                  | 75     |                                           |        |                                |        |                                                        |        |

## References

1. C. Chu, K. Wu, B. Luo, Q. Cao and H. Zhang, *Carbon Resour. Convers.*, 2023, **6**, 334-351.
2. M. Kayfeci and A. Keçebaş, in *Solar Hydrogen Production*, eds. F. Calise, M. D. D'Accadia, M. Santarelli, A. Lanzini and D. Ferrero, Academic Press, 2019, pp. 85-110.
3. M. Li, Y. Bai, C. Zhang, Y. Song, S. Jiang, D. Grouset and M. Zhang, *Int. J. Hydrogen Energy*, 2019, **44**, 10677-10693.
4. M. Aziz, *Energies*, 2021, **14**, 5917.
5. H. W. Langmi, N. Engelbrecht, P. M. Modisha and D. Bessarabov, in *Electrochemical Power Sources: Fundamentals, Systems, and Applications*, eds. T. Smolinka and J. Garche, Elsevier, 2022, pp. 455-486.
6. P. M. Modisha, C. N. M. Ouma, R. Garidzirai, P. Wasserscheid and D. Bessarabov, *Energy Fuels*, 2019, **33**, 2778-2796.
7. A. Züttel, *Mater. Today*, 2003, **6**, 24-33.
8. R. B. Biniwale, S. Rayalu, S. Devotta and M. Ichikawa, *Int. J. Hydrogen Energy*, 2008, **33**, 360-365.
9. Q.-L. Zhu and Q. Xu, *Energy Environ. Sci.*, 2015, **8**, 478-512.
10. M. P. Suh, H. J. Park, T. K. Prasad and D.-W. Lim, *Chem. Rev.*, 2012, **112**, 782-835.
11. M. Sevilla and R. Mokaya, *Energy Environ. Sci.*, 2014, **7**, 1250-1280.
12. I. P. Jain, C. Lal and A. Jain, *Int. J. Hydrogen Energy*, 2010, **35**, 5133-5144.
13. J. Yang, A. Sudik, C. Wolverton and D. J. Siegel, *Chem. Soc. Rev.*, 2010, **39**, 656-675.
14. J. O. Abe, A. P. I. Popoola, E. Ajenifuja and O. M. Popoola, *Int. J. Hydrogen Energy*, 2019, **44**, 15072-15086.
15. N. A. A. Rusman and M. Dahari, *Int. J. Hydrogen Energy*, 2016, **41**, 12108-12126.
16. T. Sadhasivam, H.-T. Kim, S. Jung, S.-H. Roh, J.-H. Park and H.-Y. Jung, *Renew. Sust. Energy Rev.*, 2017, **72**, 523-534.
17. X. Yu, Z. Tang, D. Sun, L. Ouyang and M. Zhu, *Prog. Mater. Sci.*, 2017, **88**, 1-48.
18. A. Schneemann, J. L. White, S. Kang, S. Jeong, L. F. Wan, E. S. Cho, T. W. Heo, D. Prendergast, J. J. Urban, B. C. Wood, M. D. Allendorf and V. Stavila, *Chem. Rev.*, 2018, **118**, 10775-10839.
19. Z. Chen, Z. Ma, J. Zheng, X. Li, E. Akiba and H.-W. Li, *Chin. J. Chem. Eng.*, 2021, **29**, 1-12.
20. M. Sevilla, R. Foulston and R. Mokaya, *Energy Environ. Sci.*, 2010, **3**, 223-227.
21. T. Chen, Y. Zhou, L. Luo, X. Wu, Z. Li, M. Fan and W. Zhao, *Electrochim. Acta*, 2019, **325**, 134941.
22. W. Zhao, L. Luo, H. Wang and M. Fan, *BioResources*, 2017, **12**, 1246-1262.
23. R. Pedicini, S. Maisano, V. Chiodo, G. Conte, A. Policicchio and R. G. Agostino, *Int. J. Hydrogen Energy*, 2020, **45**, 14038-14047.
24. L. S. Blankenship and R. Mokaya, *Energy Environ. Sci.*, 2017, **10**, 2552-2562.
25. L. S. Blankenship, N. Balahmar and R. Mokaya, *Nat. Commun.*, 2017, **8**, 1545.
26. N. Kostoglou, A. Tarat, I. Walters, V. Ryzhkov, C. Tampaxis, G. Charalambopoulou, T. Steriotis, C. Mitterer and C. Rebholz, *Micropor. Mesopor. Mat.*, 2016, **225**, 482-487.
27. Z. Wang, L. Sun, F. Xu, H. Zhou, X. Peng, D. Sun, J. Wang and Y. Du, *Int. J. Hydrogen Energy*, 2016, **41**, 8489-8497.
28. H. Akasaka, T. Takahata, I. Toda, H. Ono, S. Ohshio, S. Himeno, T. Kokubu and H. Saitoh, *Int. J. Hydrogen Energy*, 2011, **36**, 580-585.
29. M. Sevilla, N. Alam and R. Mokaya, *J. Phys. Chem. C*, 2010, **114**, 11314-11319.
30. N. Kostoglou, C. Koczwara, C. Prehal, V. Terziyska, B. Babic, B. Matovic, G. Constantinides, C. Tampaxis, G. Charalambopoulou, T. Steriotis, S. Hinder, M. Baker, K. Polychronopoulou, C. Doumanidis, O. Paris, C. Mitterer and C. Rebholz, *Nano Energy*, 2017, **40**, 49-64.
31. B. Adeniran and R. Mokaya, *J. Mater. Chem. A*, 2015, **3**, 5148-5161.

32. S. Stock, N. Kostoglou, J. Selinger, S. Spirk, C. Tampaxis, G. Charalambopoulou, T. Steriotis, C. Rebholz, C. Mitterer and O. Paris, *ACS Appl. Energy Mater.*, 2022, **5**, 10915-10926.
33. N. F. Attia, M. Jung, J. Park, H. Jang, K. Lee and H. Oh, *Chem. Eng. J.*, 2020, **379**, 122367.
34. A. Klechikov, G. Mercier, T. Sharifi, I. A. Baburin, G. Seifert and A. V. Talyzin, *Chem. Commun.*, 2015, **51**, 15280-15283.
35. N. Bader and A. Ouederni, *J. Energy Storage*, 2016, **5**, 77-84.
36. P. García-Holley, B. Schweitzer, T. Islamoglu, Y. Liu, L. Lin, S. Rodriguez, M. H. Weston, J. T. Hupp, D. A. Gómez-Gualdrón, T. Yildirim and O. K. Farha, *ACS Energy Lett.*, 2018, **3**, 748-754.
37. Z. Chen, M. R. Mian, S.-J. Lee, H. Chen, X. Zhang, K. O. Kirlikovali, S. Shulda, P. Melix, A. S. Rosen and P. A. Parilla, *J. Am. Chem. Soc.*, 2021, **143**, 18838-18843.
38. B. J. Bucior, N. S. Bobbitt, T. Islamoglu, S. Goswami, A. Gopalan, T. Yildirim, O. K. Farha, N. Bagheri and R. Q. Snurr, *Mol. Syst. Des. Eng.*, 2019, **4**, 162-174.
39. S. S. Kaye, A. Dailly, O. M. Yaghi and J. R. Long, *J. Am. Chem. Soc.*, 2007, **129**, 14176-14177.
40. A. Ahmed, Y. Liu, J. Purewal, L. D. Tran, A. G. Wong-Foy, M. Veenstra, A. J. Matzger and D. J. Siegel, *Energy Environ. Sci.*, 2017, **10**, 2459-2471.
41. Z. Chen, P. Li, R. Anderson, X. Wang, X. Zhang, L. Robison, L. R. Redfern, S. Moribe, T. Islamoglu, D. A. Gómez-Gualdrón, T. Yildirim, J. F. Stoddart and O. K. Farha, *Science*, 2020, **368**, 297-303.
42. D. A. Gómez-Gualdrón, T. C. Wang, P. García-Holley, R. M. Sawelewa, E. Argueta, R. Q. Snurr, J. T. Hupp, T. Yildirim and O. K. Farha, *ACS Appl. Mat. Interfaces*, 2017, **9**, 33419-33428.
43. D. A. Gómez-Gualdrón, Y. J. Colón, X. Zhang, T. C. Wang, Y.-S. Chen, J. T. Hupp, T. Yildirim, O. K. Farha, J. Zhang and R. Q. Snurr, *Energy Environ. Sci.*, 2016, **9**, 3279-3289.
44. B. Wang, X. Zhang, H. Huang, Z. Zhang, T. Yildirim, W. Zhou, S. Xiang and B. Chen, *Nano Res.*, 2021, **14**, 507-511.
45. A. Ahmed, S. Seth, J. Purewal, A. G. Wong-Foy, M. Veenstra, A. J. Matzger and D. J. Siegel, *Nat. Commun.*, 2019, **10**, 1568.
46. S. E. Bambalaza, H. W. Langmi, R. Mokaya, N. M. Musyoka and L. E. Khotseng, *ACS Appl. Mat. Interfaces*, 2020, **12**, 24883-24894.
47. K. Sumida, S. Horike, S. S. Kaye, Z. R. Herm, W. L. Queen, C. M. Brown, F. Grandjean, G. J. Long, A. Dailly and J. R. Long, *Chem. Sci.*, 2010, **1**, 184-191.
48. J. A. Villajos, *C*, 2022, **8**, 5.
49. S. V. Chuvikov and S. N. Klyamkin, *Int. J. Energy Res.*, 2022, **46**, 21937-21947.
50. H. Furukawa, N. Ko, Y. B. Go, N. Aratani, S. B. Choi, E. Choi, A. Ö. Yazaydin, R. Q. Snurr, M. O'Keeffe, J. Kim and O. M. Yaghi, *Science*, 2010, **329**, 424-428.
51. D. Zhao, X. Wang, L. Yue, Y. He and B. Chen, *Chem. Commun.*, 2022.
52. S. S. Han, H. Furukawa, O. M. Yaghi and W. A. Goddard Iii, *J. Am. Chem. Soc.*, 2008, **130**, 11580-11581.
53. S. Ghosh and J. K. Singh, *Int. J. Hydrogen Energy*, 2019, **44**, 1782-1796.
54. H. M. El-Kaderi, J. R. Hunt, J. L. Mendoza-Cortés, A. P. Côté, R. E. Taylor, M. O'Keeffe and O. M. Yaghi, *Science*, 2007, **316**, 268-272.
55. D. Cao, J. Lan, W. Wang and B. Smit, *Angew. Chem. Int. Ed.*, 2009, **48**, 4730-4733.
56. L.-Y. Bian, X.-D. Li, X.-Y. Huang, P.-h. Yang, Y.-D. Wang, X.-Y. Liu and Z. Chen, *Int. J. Hydrogen Energy*, 2022, **47**, 29390-29398.
57. V. B. Parambath, R. Nagar and S. Ramaprabhu, *Langmuir*, 2012, **28**, 7826-7833.
58. B. P. Vinayan, R. Nagar and S. Ramaprabhu, *J. Mater. Chem. A*, 2013, **1**, 11192-11199.
59. A. Ariharan, B. Viswanathan and V. Nandhakumar, *Graphene*, 2016, **5**, 39-50.

60. S. V. Sawant, M. D. Yadav, S. Banerjee, A. W. Patwardhan, J. B. Joshi and K. Dasgupta, *Int. J. Hydrogen Energy*, 2021, **46**, 39297-39314.
61. S. Banerjee, K. Dasgupta, A. Kumar, P. Ruz, B. Vishwanadh, J. B. Joshi and V. Sudarsan, *Int. J. Hydrogen Energy*, 2015, **40**, 3268-3276.
62. M. Zhong, Z. Fu, R. Mi, X. Liu, X. Li, L. Yuan, W. Huang, X. Yang, Y. Tang and C. Wang, *Int. J. Hydrogen Energy*, 2018, **43**, 19174-19181.
63. P. Divya and S. Ramaprabhu, *Phys. Chem. Chem. Phys.*, 2014, **16**, 26725-26729.
64. S. B. Kalidindi, H. Oh, M. Hirscher, D. Esken, C. Wiktor, S. Turner, G. Van Tendeloo and R. A. Fischer, *Chem. –A Eur. J.*, 2012, **18**, 10848-10856.
65. P.-C. Kang, Y.-S. Ou, G.-L. Li, J.-K. Chang and C.-Y. Wang, *ACS Appl. Nano Mater.*, 2021, **4**, 11269-11280.
66. N. Thaweelap, P. Plerdsranoy, Y. Poo-arporn, P. Khajondetchairit, S. Suthirakun, I. Fongkaew, P. Hirunsit, N. Chanlek, O. Utke, A. Pangon and R. Utke, *Fuel*, 2021, **288**, 119608.
67. Y. Pramudya and J. L. Mendoza-Cortes, *J. Am. Chem. Soc.*, 2016, **138**, 15204-15213.
68. X. Zhang, Y. Liu, Z. Ren, X. Zhang, J. Hu, Z. Huang, Y. Lu, M. Gao and H. Pan, *Energy Environ. Sci.*, 2021, **14**, 2302-2313.
69. N. Rambhujun and K.-F. Aguey-Zinsou, *Int. J. Hydrogen Energy*, 2021, **46**, 28675-28685.
70. M. S. Salman, A. Rawal and K.-F. Aguey-Zinsou, *Adv. Energy Sustainability Res.*, 2021, **2**, 2100063.
71. T. Wang and K.-F. Aguey-Zinsou, *ACS Appl. Energy Mater.*, 2020, **3**, 9940-9949.
72. T. Wang and K.-F. Aguey-Zinsou, *Int. J. Hydrogen Energy*, 2020, **45**, 2054-2067.
73. T. Wang and K.-F. Aguey-Zinsou, *Energy Technol.*, 2019, **7**, 1801159.
74. T. Wang and K.-F. Aguey-Zinsou, *Int. J. Hydrogen Energy*, 2021, **46**, 24286-24292.
75. X. Zhang, W. Zhang, L. Zhang, Z. Huang, J. Hu, M. Gao, H. Pan and Y. Liu, *Chem. Eng. J.*, 2022, **428**, 132566.
